# Supplementary material for: Micro–nanoarchitectures of electrodeposited Ni–ITO nanocomposites on copper foil as electrocatalysts for the oxygen evolution reaction
Source: Royal Society of Chemistry journal article supplement (doi:10.1039/d0nj05954d), 2021-01-01
Supplement: d0nj05954d1.pdf [file d0nj05954d1.pdf]

**Electronic Supplementary Information**

**Micro-nanoarchitectures of electrodeposited Ni-ITO nanocomposites on copper foil as electrocatalysts for oxygen evolution reaction**

P. Sivasakthi,<sup>a</sup> M.V. Sangaranarayanan<sup>b</sup> and H. Gurumallesh Prabu<sup>a\*</sup>

<sup>a</sup>Department of Industrial Chemistry, Alagappa University, Karaikudi, India.

<sup>b</sup>Department of Chemistry, Indian Institute of Technology Madras, Chennai-36, India.

E-mail: hgprabhu@alagappauniversity.ac.in

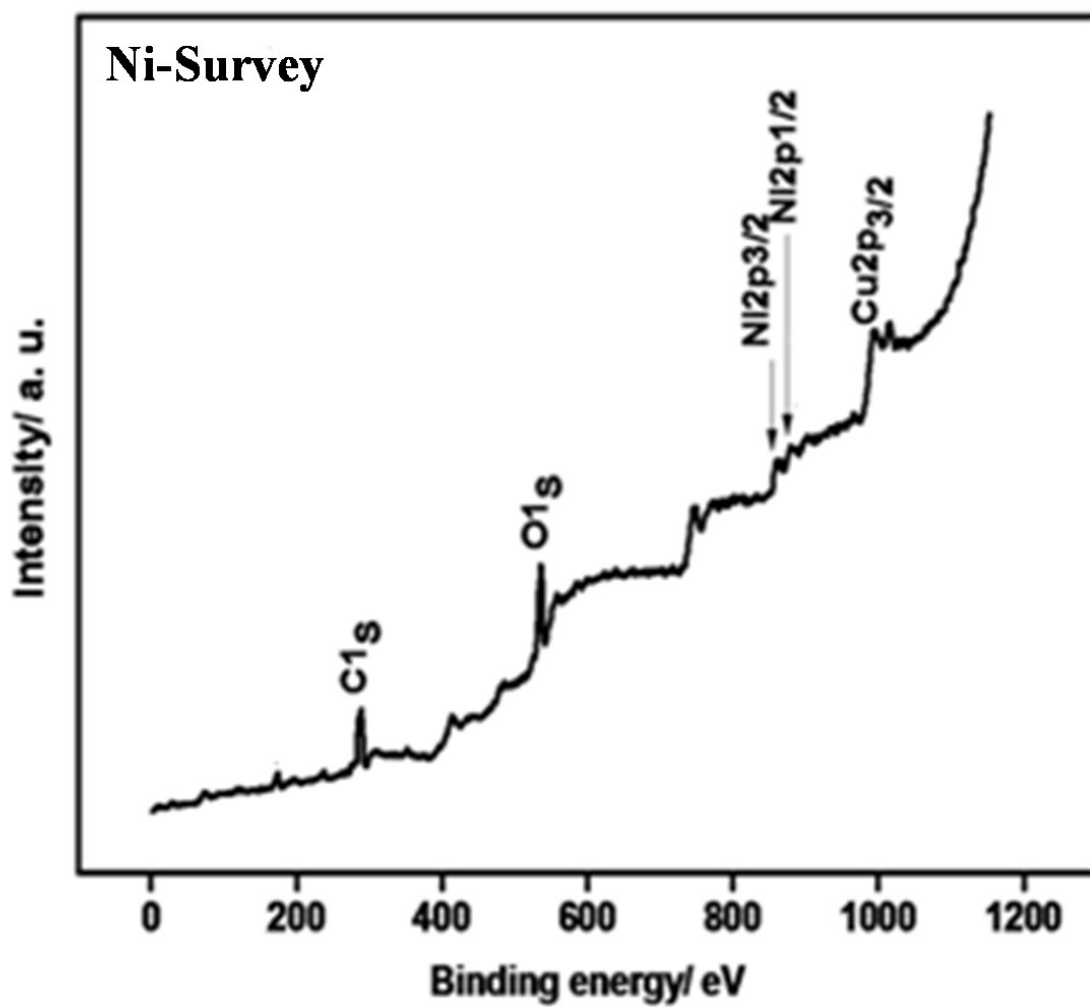

Fig. S1 XPS spectra of Ni.

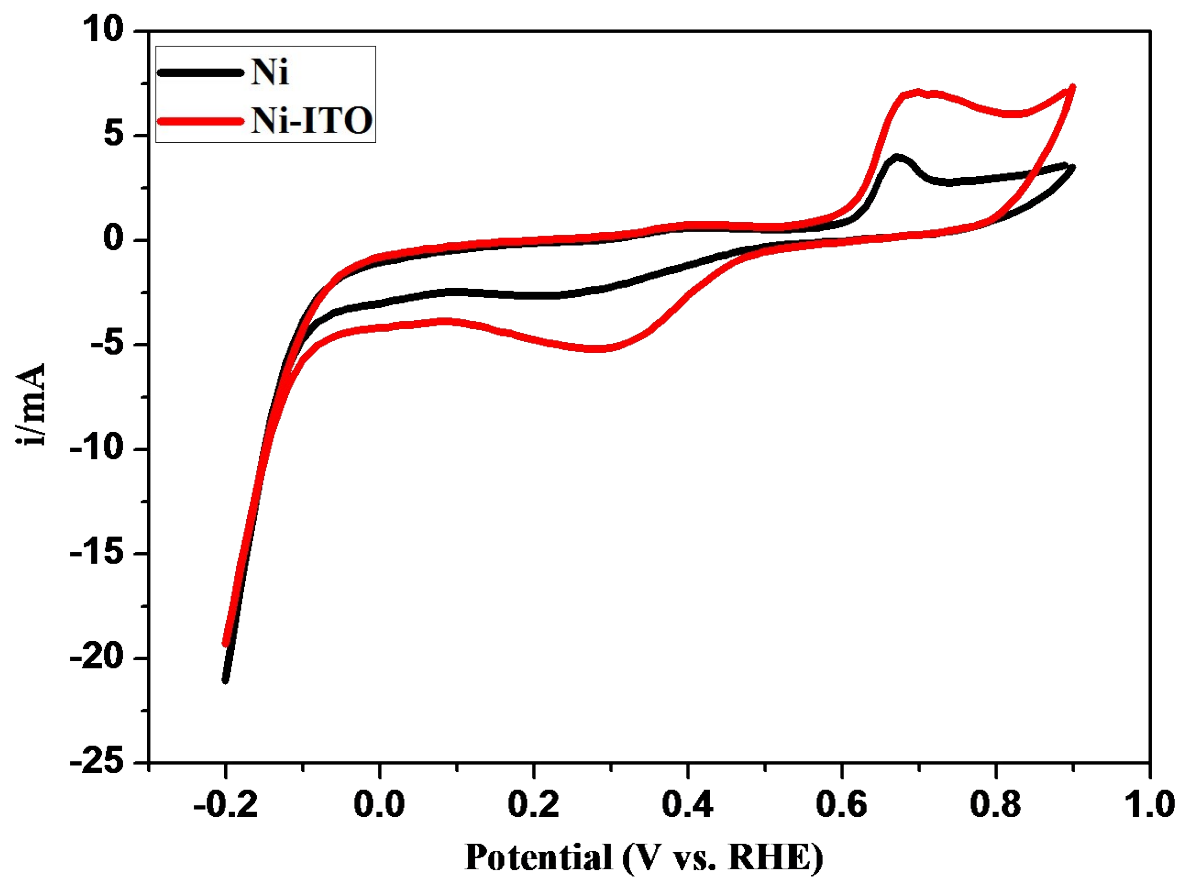

Fig. S2 Cyclic voltammograms of Ni and Ni-ITO nanocomposites electrodes in 1 M KOH solution at 50  $\text{mVs}^{-1}$  in the cathodic region.

**Table S1: The standard deviation of ECSA, current per ECSA, potential, current per geometrical surface area, current per Ni weight and Tafel slope for Ni and Ni-ITO nanocomposites.**

| <b>Electrode</b>      | <b>ECSA</b>           | <b>Current per ECSA</b> | <b>Potential</b>      | <b>Current per geometrical surface area</b> | <b>Current per Ni</b> | <b>Tafel slope</b>    |
|-----------------------|-----------------------|-------------------------|-----------------------|---------------------------------------------|-----------------------|-----------------------|
| Ni                    | $3.51 \times 10^{-3}$ | $8.75 \times 10^{-3}$   | $8.17 \times 10^{-3}$ | $1.86 \times 10^{-2}$                       | $7.38 \times 10^{-5}$ | $1.38 \times 10^{-1}$ |
| Ni-ITO nanocomposites | $8.09 \times 10^{-4}$ | $8.23 \times 10^{-3}$   | $8.23 \times 10^{-4}$ | $1.19 \times 10^{-2}$                       | $8.32 \times 10^{-4}$ | $1.36 \times 10^{-1}$ |
